# Supplementary material for: A highly stable non-noble metal Ni2P co-catalyst for increased H2generation by g-C3N4under visible light irradiation
Source: Royal Society of Chemistry journal article supplement (doi:10.1039/c7ta01031a), 2017-01-01
Supplement: c7ta01031a1.pdf [file c7ta01031a1.pdf]

## Highly stable non-noble metal Ni<sub>2</sub>P co-catalyst for increased H<sub>2</sub> generation by g-C<sub>3</sub>N<sub>4</sub> under visible light irradiation

Ping Ye,<sup>a</sup> Xinling Liu,<sup>a</sup> James Iocozzia,<sup>b</sup> Yupeng Yuan,<sup>\*a, b</sup> Lina Gu,<sup>a</sup> Gengsheng Xu,<sup>a</sup> Zhiqun

Lin<sup>\*b</sup>

<sup>a</sup> School of Chemistry and Chemical Engineering, Anhui University, Hefei 230036, P. R. China.

<sup>b</sup> School of Materials Science and Engineering, Georgia Institute of Technology, Atlanta, GA 30332, USA .

Corresponding authors:

Email: [yupengyuan@ahu.edu.cn](mailto:yupengyuan@ahu.edu.cn) (Y. Yuan); [zhiqun.lin@mse.gatech.edu](mailto:zhiqun.lin@mse.gatech.edu) (Z. Lin).

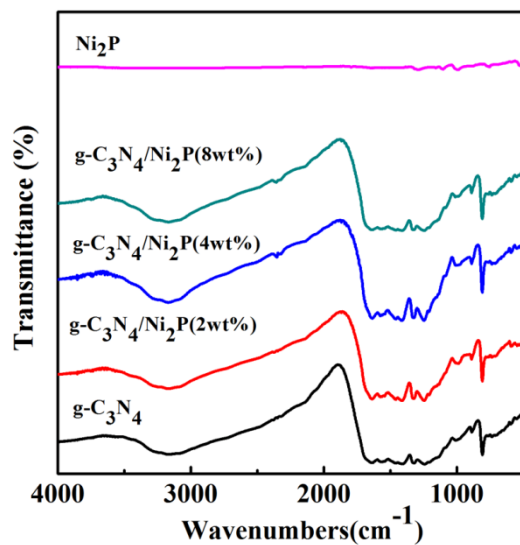

**Fig. S1** FT-IR spectra of pure g-C<sub>3</sub>N<sub>4</sub> and g-C<sub>3</sub>N<sub>4</sub>/Ni<sub>2</sub>P composites with various amount of Ni<sub>2</sub>P (i.e. 2wt%, 4wt%, and 8wt%). FT-IR for Ni<sub>2</sub>P is also provided for reference.

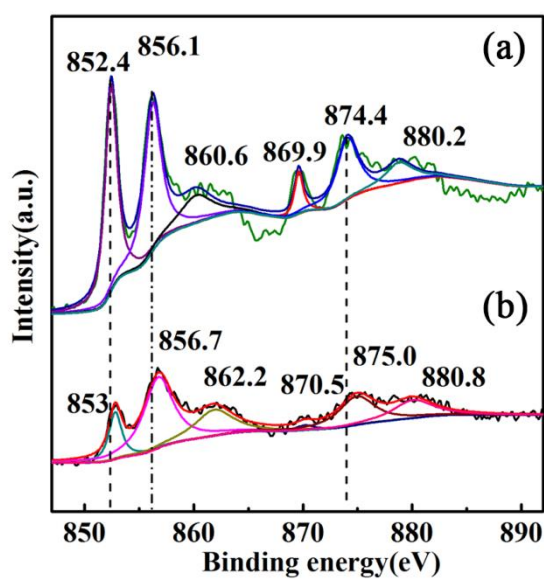

**Fig. S2** XPS spectra of Ni 2p binding energy in (a) pure Ni<sub>2</sub>P and (b) g-C<sub>3</sub>N<sub>4</sub>/Ni<sub>2</sub>P(8wt%) sample.

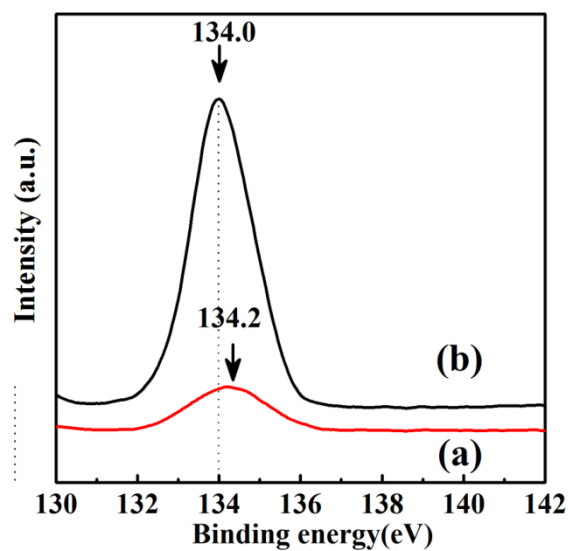

**Fig. S3** XPS spectra of P 2p binding energy in (a) pure Ni<sub>2</sub>P and (b) g-C<sub>3</sub>N<sub>4</sub>/Ni<sub>2</sub>P(8wt%) samples.

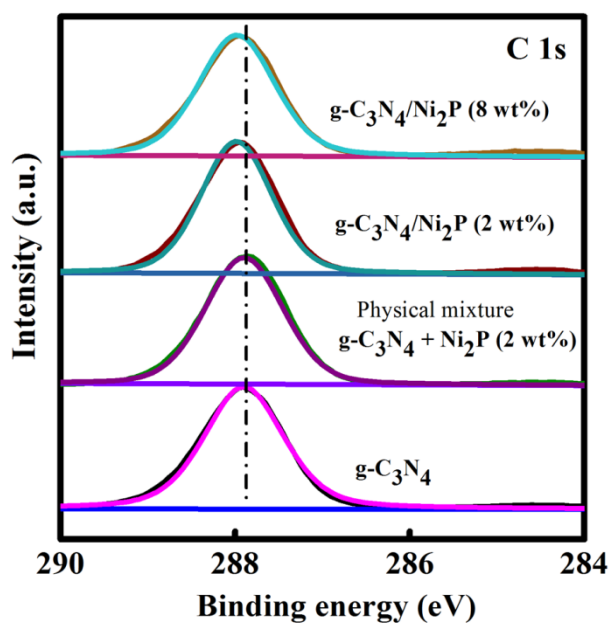

**Fig. S4** XPS spectra of C 1s binding energy in pure g-C<sub>3</sub>N<sub>4</sub>, a physical mixture of g-C<sub>3</sub>N<sub>4</sub> and Ni<sub>2</sub>P (2 wt%), g-C<sub>3</sub>N<sub>4</sub>/Ni<sub>2</sub>P (2 wt%), and g-C<sub>3</sub>N<sub>4</sub>/Ni<sub>2</sub>P (8 wt%) samples.

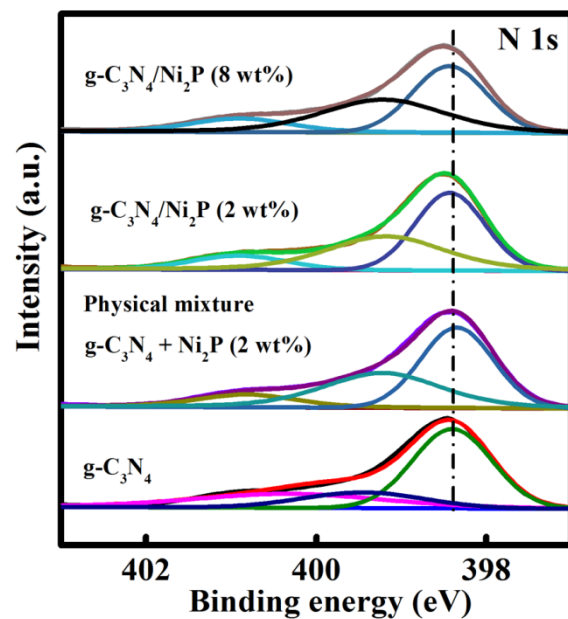

**Fig. S5** XPS spectra of N 1s binding energy in pure g-C<sub>3</sub>N<sub>4</sub>, a physical mixture of g-C<sub>3</sub>N<sub>4</sub> and Ni<sub>2</sub>P (2 wt%), g-C<sub>3</sub>N<sub>4</sub>/Ni<sub>2</sub>P (2 wt%), and g-C<sub>3</sub>N<sub>4</sub>/Ni<sub>2</sub>P (8 wt%) samples.

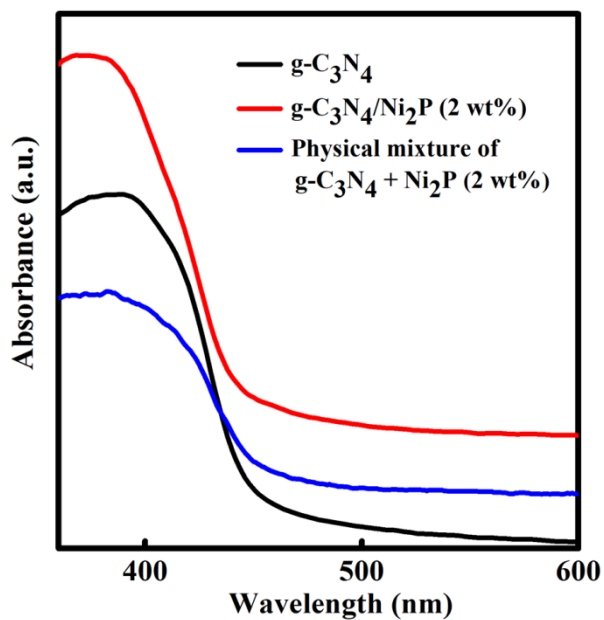

**Fig. S6** UV-vis absorption spectra of pure g-C<sub>3</sub>N<sub>4</sub>, g-C<sub>3</sub>N<sub>4</sub>/Ni<sub>2</sub>P (2 wt%), and a physical mixture of g-C<sub>3</sub>N<sub>4</sub> and Ni<sub>2</sub>P (2 wt%).

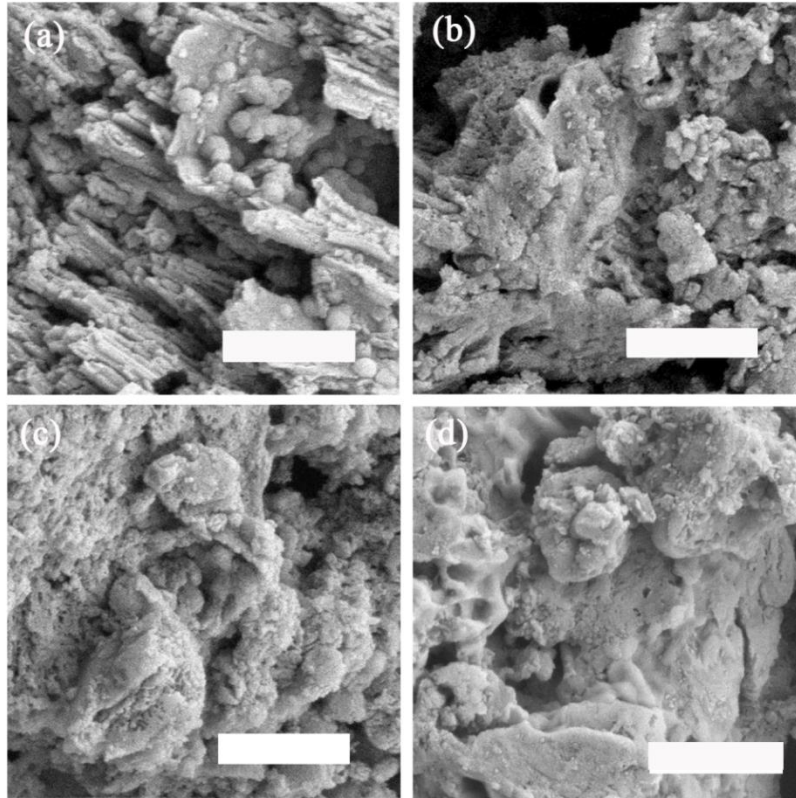

**Fig. S7** SEM images of (a) pure  $g\text{-C}_3\text{N}_4$ , (b)  $g\text{-C}_3\text{N}_4/\text{Ni}_2\text{P}(2\text{wt}\%)$ , (c)  $g\text{-C}_3\text{N}_4/\text{Ni}_2\text{P}(4\text{wt}\%)$ , and (d)  $g\text{-C}_3\text{N}_4/\text{Ni}_2\text{P}(8\text{wt}\%)$  sample. The scale bar is 1  $\mu\text{m}$ .

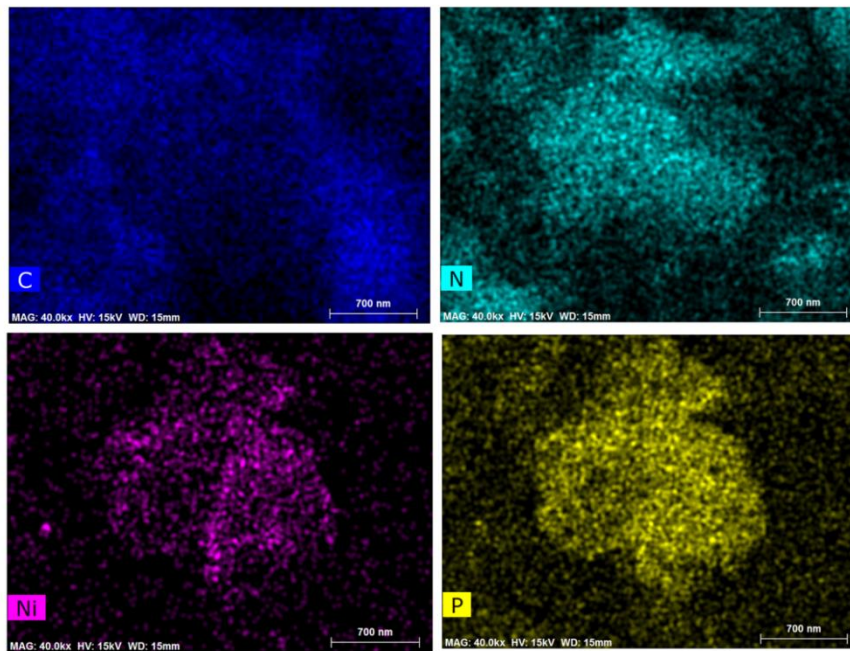

**Fig. S8** Elemental mapping for C, N, Ni, and P in  $g\text{-C}_3\text{N}_4/\text{Ni}_2\text{P}(2\text{wt}\%)$  sample.

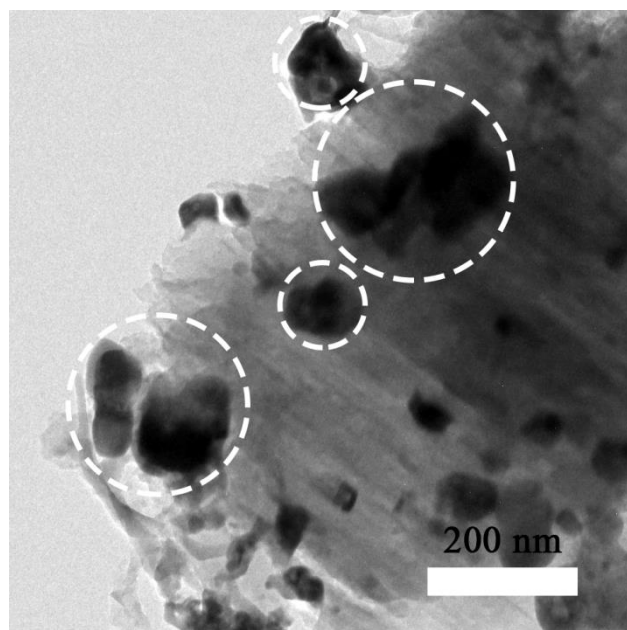

**Fig. S9** TEM image of a g-C<sub>3</sub>N<sub>4</sub>/Ni<sub>2</sub>P(8wt%) sample. The growth and aggregation of Ni<sub>2</sub>P particle is highlighted by the dashed circles.

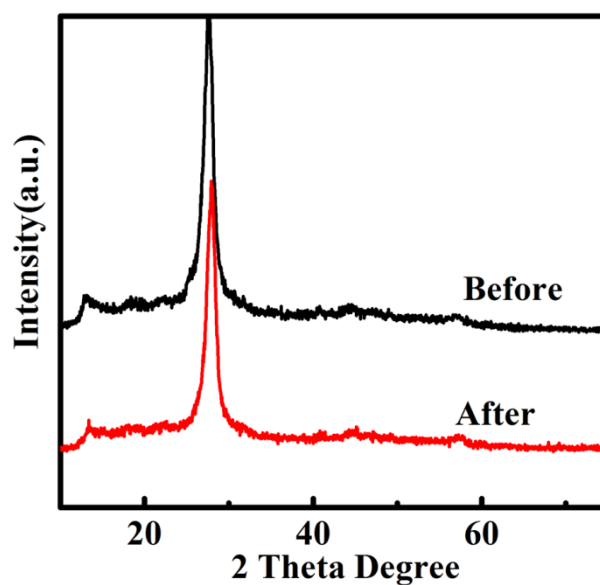

**Fig. S10** XRD patterns of a g-C<sub>3</sub>N<sub>4</sub>/Ni<sub>2</sub>P(2wt%) sample before and after 24 h long-term H<sub>2</sub> evolution testing.

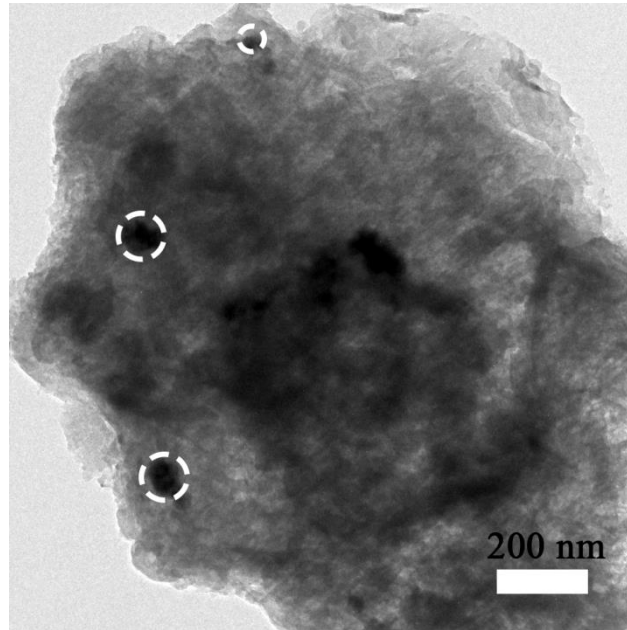

**Fig. S11** TEM image of a g-C<sub>3</sub>N<sub>4</sub>/Ni<sub>2</sub>P(2wt%) sample after 24 h long-term H<sub>2</sub> evolution testing. Ni<sub>2</sub>P particles are shown by dashed circles.

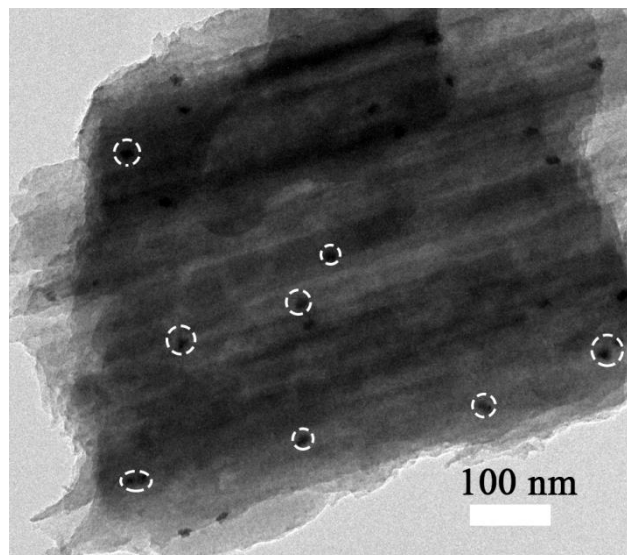

**Fig. S12** TEM image of a g-C<sub>3</sub>N<sub>4</sub>/Pt (0.5 wt%) sample after 24 h long term H<sub>2</sub> evolution testing.

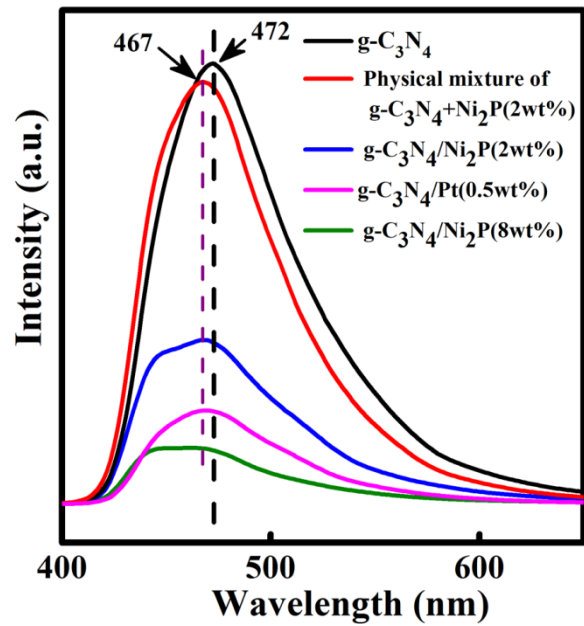

**Fig. S13** Stable photoluminescence spectra of pure  $g\text{-C}_3\text{N}_4$ ,  $g\text{-C}_3\text{N}_4/\text{Ni}_2\text{P}(2\text{wt}\%)$ ,  $g\text{-C}_3\text{N}_4/\text{Ni}_2\text{P}(8\text{wt}\%)$ ,  $g\text{-C}_3\text{N}_4/\text{Pt}(0.5\text{wt}\%)$ , and a physical mixture of  $g\text{-C}_3\text{N}_4$  and  $\text{Ni}_2\text{P}(2\text{wt}\%)$  measured in the solid state.

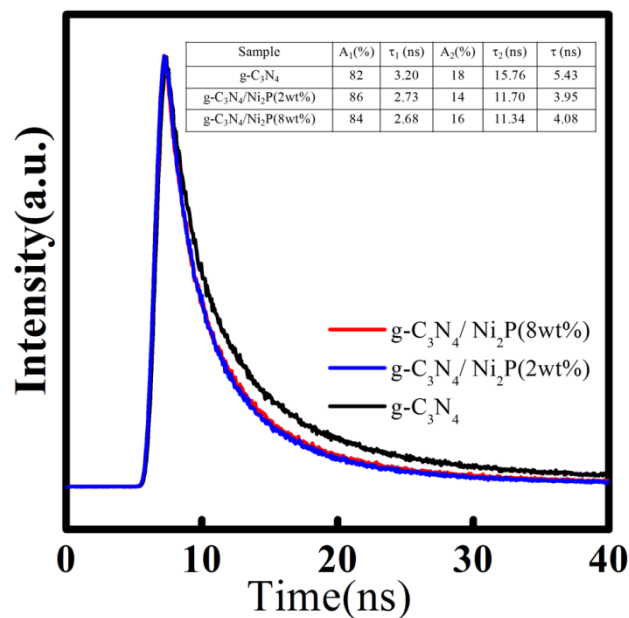

**Fig. 14** Time-resolved photoluminescence decay spectra of pure  $g\text{-C}_3\text{N}_4$ ,  $g\text{-C}_3\text{N}_4/\text{Ni}_2\text{P}(2\text{wt}\%)$ , and  $g\text{-C}_3\text{N}_4/\text{Ni}_2\text{P}(8\text{wt}\%)$  measured in the solid state. The fitted lifetime from the fluorescence decays are illustrated in the table (inset).
